# Supplementary material
Source: PubMed Central journal article supplement (PMC4670621)
Supplement: NIHMS701453-supplement-3.pdf [file NIHMS701453-supplement-3.pdf]

**Supplementary File 3 – Drugs indicated for the treatment of neuropathic pain on 112 NEMLS**

|                               | NEMLS indicating a drug<br>for the treatment of any<br>neuropathic pain<br>(n) | Indications for any<br>central neuropathic<br>pain<br>[n (% of total indications)] | Indications for any<br>peripheral neuropathic<br>pain<br>[n (% of total indications)] | Indications for specific neuropathic<br>pain conditions<br>[n (% of total indications)] |        |         |         |
|-------------------------------|--------------------------------------------------------------------------------|------------------------------------------------------------------------------------|---------------------------------------------------------------------------------------|-----------------------------------------------------------------------------------------|--------|---------|---------|
|                               |                                                                                |                                                                                    |                                                                                       | DPN                                                                                     | PHN    | HIV-SN  | TGN     |
| <i>TCAs</i>                   |                                                                                |                                                                                    |                                                                                       |                                                                                         |        |         |         |
| Amitriptyline                 | 10                                                                             | 1 (10)                                                                             | 6 (60)                                                                                | 5 (50)                                                                                  | 6 (60) | 3 (30)  | 2 (20)  |
| Imipramine                    | 1                                                                              | 0 (0)                                                                              | 0 (0)                                                                                 | 0 (0)                                                                                   | 0 (0)  | 0 (0)   | 0 (0)   |
| Nortriptyline                 | 1                                                                              | 0 (0)                                                                              | 0 (0)                                                                                 | 0 (0)                                                                                   | 0 (0)  | 0 (0)   | 0 (0)   |
| Clomipramine                  | 1                                                                              | 0 (0)                                                                              | 0 (0)                                                                                 | 0 (0)                                                                                   | 0 (0)  | 0 (0)   | 0 (0)   |
| <i>SNRIs</i>                  |                                                                                |                                                                                    |                                                                                       |                                                                                         |        |         |         |
| Duloxetine                    | 2                                                                              | 0 (0)                                                                              | 2 (100)                                                                               | 2 (100)                                                                                 | 0 (0)  | 0 (0)   | 0 (0)   |
| <i>Anticonvulsants</i>        |                                                                                |                                                                                    |                                                                                       |                                                                                         |        |         |         |
| Carbamazepine <sup>1</sup>    | 16                                                                             | 2 (12)                                                                             | 12 (75)                                                                               | 4 (25)                                                                                  | 5 (31) | 2 (12)  | 12 (75) |
| Gabapentin                    | 8                                                                              | 0 (0)                                                                              | 2 (25)                                                                                | 1 (12)                                                                                  | 1 (12) | 0 (0)   | 1 (12)  |
| Sodium valproate <sup>2</sup> | 3                                                                              | 0 (0)                                                                              | 2 (67)                                                                                | 0 (0)                                                                                   | 2 (67) | 0 (0)   | 0 (0)   |
| Pregabalin                    | 2                                                                              | 0 (0)                                                                              | 0 (0)                                                                                 | 0 (0)                                                                                   | 0 (0)  | 0 (0)   | 0 (0)   |
| Oxcarbazepine <sup>1</sup>    | 1                                                                              | 0 (0)                                                                              | 0 (0)                                                                                 | 0 (0)                                                                                   | 0 (0)  | 0 (0)   | 0 (0)   |
| <i>Opioids</i>                |                                                                                |                                                                                    |                                                                                       |                                                                                         |        |         |         |
| Tramadol                      | 4                                                                              | 0 (0)                                                                              | 3 (75)                                                                                | 1 (25)                                                                                  | 1 (25) | 3 (75)  | 1 (25)  |
| Morphine                      | 2                                                                              | 0 (0)                                                                              | 2 (100)                                                                               | 1 (50)                                                                                  | 0 (0)  | 2 (100) | 0 (0)   |
| <i>Other</i>                  |                                                                                |                                                                                    |                                                                                       |                                                                                         |        |         |         |
| Ibuprofen <sup>3</sup>        | 4                                                                              | 0 (0)                                                                              | 3 (75)                                                                                | 2 (50)                                                                                  | 1 (25) | 2 (50)  | 1 (25)  |
| Paracetamol <sup>3</sup>      | 1                                                                              | 0 (0)                                                                              | 1 (100)                                                                               | 0 (0)                                                                                   | 0 (0)  | 1 (100) | 0 (0)   |

*NEML: national essential medicines list; TCAs: tricyclic antidepressants; SNRIs: serotonin and noradrenaline reuptake inhibitors; DPN: diabetic polyneuropathy; PHN: post-herpetic neuralgia; HIV-SN: HIV-associated sensory neuropathy; TGN: trigeminal neuralgia; <sup>1</sup> inconclusive evidence for its use outside of treating trigeminal neuralgia [8]; <sup>2</sup> weak recommendation against its use in treating neuropathic pain [8]; <sup>3</sup> no evidence of efficacy in treating neuropathic pain*
